# Supplementary material for: A missing link in the carbon cycle: phytoplankton light absorption under RCP scenarios
Source: Copernicus journal article supplement (doi:10.5194/egusphere-2023-921), 2023-05-24
Supplement: Supplementary file [file egusphere-2023-921-AC1-supplement.pdf]

Review of “A missing link in the carbon cycle: phytoplankton light absorption under RCP scenarios” by Asselot et al.,

### General Comments

Asselot et al., quantify the impact of considering phytoplankton light absorption on the carbon cycle and climate under a multi-centennial future projections using an Earth System model. They find that resolving this additional process leads to increases in chlorophyll, sea surface and atmospheric temperatures, plus increases in atmospheric CO<sub>2</sub>.

The experimental design and key results appear to be robust. The justification for considering multi-centennial timescales and the light absorption could be clearer in the introduction though, with some useful context only appearing at the end of the manuscript. The explanation of why phytoplankton light absorption leads to the key is not currently robust – there are clarifications and more analysis needed on the role of temperature in the ecosystem model and, in my view, over interpretation of minimal biological carbon pump changes that needs addressing. One of the most interesting outcomes of the study for me is that the impact of light absorption has a non-linear dependence on the scenarios but unfortunately I don't think the explanation for this is as robust as it can be.

We would like to thank the reviewer for their very constructive comments, which greatly helped to improve the quality of the manuscript. Our responses are in blue, with edits to the manuscript in red.

### Specific Comments

Lines 20 – 35: Cael et al., (2023) is a recent addition to the literature on observations that should be cited.

We thank the reviewer and added the sentence:

“For instance, satellite observations demonstrate that low-latitude oceans have become greener due to climate change between 2002–2022 (Cael et al., 2023)”

Line 47: “Following RCP8.5 scenario” – may be better phrased as something like “Under a scenario of anthropogenic emissions,…” to better differentiate it from the 1% atmospheric CO<sub>2</sub> increase experiment discussed in the previous experiment.

We rephrased by:

“Additionally, the sensitivity of the light attenuation coefficient for phytoplankton is investigated under the RCP8.5 scenario (Kvale and Meissner, 2017)”

Line 63: “long timescale” – be more precise, do you mean centennial or millennial for example? Why is a >2100 timescale important to consider?

By “long timescale” we meant multi-century timescale. In section 2.6 of the revised manuscript we added:

“We consider a multi-century timescale to evaluate the long term influence of anthropogenic CO<sub>2</sub> emissions. Even if these emissions cease or are reduced by 2100, their influence will be echoed for centuries.”

Section 2: This seems like a subsection of the Methods rather than its own individual section

We moved the “RCP” section into the Methods section.

Lines 83 – 84: the analysis is quantitative here in at least you quantify the net impacts. You don't quantify the components or drivers of those net impacts, but I don't think you need to frame that as qualitative!

We rephrase by:

“we focus on the quantification of the large-scale impacts of phytoplankton light absorption but we do not quantify the components or drivers of those large-scale impacts.”

Lines 132 –133: This could be more precise. For example, you can back out the percentage of POC remineralised from the e-folding depth (or the net flux from the curve if it's a double exponential) which gives a more intuitive metric here. This also needs to take into account the bottom depth of the euphotic layer which I think is different here than in Ward et al., (2018) so 590m may actually be a few hundred meters deeper. I am not sure where the <590m figure comes from DOM remineralisation as this is dependent on advection vs. remineralisation timescale – I think perhaps 590m gives the wrong impression of what's happening, maybe a more approximate number might help.

We apology for the confusion here, the figure 590 m is wrong. In our study, the base of the euphotic layer is 221.84 m. The POM is predominantly remineralized below the base of the euphotic layer (221.84 m) while DOM is remineralized above this limit. Over the water column, 30% of the remineralization of POM occurs above the euphotic layer (0 – 221.84 m) while the remaining 70% occurs below this layer. We rephrase by:

“To achieve this, the flux is partitioned between POM, of which, on average, 70% is remineralized below the euphotic layer (0 – 221.84 m), and DOM which is predominantly remineralized within this layer.”

Lines 142 / 187 – 188 / Appendix B: What is the logic behind the choice of PFT cell sizes? Notably, the zooplankton size class is less than 10 times bigger than the phytoplankton which contrasts with the optimum grazing prey length ratio of 10 times smaller. This means the zooplankton type is not grazing optimally on the phytoplankton, e.g., the proportion of the prey biomass available to the grazer (eqn. 20 in Ward et al., 2018) equals 0.8471 here.

In this study, we use the same PFT cell sizes as in our previous studies (Asselot et al., 2021; Asselot et al., 2022). In Asselot et al. (2021), we conducted a simulation with low ecosystem complexity (simulation A) and a simulation with a high ecosystem complexity (simulation B). The PFT cell sizes used in these simulations are tabulated below. The 12 PFT cell sizes of simulation B are a subset of the 16 sizes used by Ward et al. (2018), noting that we neglected the two largest phytoplankton and zooplankton classes because these were found to contribute negligible biomass. For consistency, the PFT cell sizes of simulation A were taken as the average class size of simulation B in preference to an idealised assumption of an optimal grazing prey length ratio. In Asselot et al. (2021) we showed that the climate impact of changing between these representations of ecosystem complexity is negligible compared to that from phytoplankton light absorption, and we here use only the low ecosystem complexity (PFT cell sizes corresponding to simulation A).

We have added the text:

**“We consider only one phytoplankton and one zooplankton class size, following the low ecosystem complexity model of Asselot et al (2021), noting that Asselot et al (2021) found that the climate impact of changing ecosystem complexity was negligible compared to that from phytoplankton light absorption.”**

|                    | Simulation A | Simulation B |
|--------------------|--------------|--------------|
| Phytoplankton (µm) | 46.25        | 0.60         |
| Phytoplankton (µm) |              | 1.90         |
| Phytoplankton (µm) |              | 6.0          |
| Phytoplankton (µm) |              | 19.0         |
| Phytoplankton (µm) |              | 60.0         |
| Phytoplankton (µm) |              | 190.0        |
| Zooplankton (µm)   | 146.15       | 1.90         |
| Zooplankton (µm)   |              | 6.0          |
| Zooplankton (µm)   |              | 19.0         |
| Zooplankton (µm)   |              | 60.0         |
| Zooplankton (µm)   |              | 190.0        |
| Zooplankton (µm)   |              | 600.0        |

Line 142: “species” is not appropriate given the trait-based model, “group” or “type” might be better.

We changed “species” to “group”

Lines 161 – 163 / 325 / Appendix A:

- I am struggling to see the suggested effect of SST on chlorophyll around 20 degrees C on Figure A1. Arguably, the upper part of the distribution of

chlorophyll begins to decrease around 20 degrees but the lower part of the distribution decreases from 10 degrees.

- I don't think you can conclusively conclude on the relationship with SST because Figure A1 also includes other factors that may be co-varying with SST, e.g., nutrient availability. To do this, I think you'd need to plot this with a constant nutrient concentration or vary temperature whilst keeping nutrient concentrations fixed.

- The net effect of temperature dependence is quite complicated. Nutrient uptake and grazing rates increase with temperature, however net nutrient uptake can be limited by nutrient availability leading to disproportionate effects depending on location. For example, the temperature effect of grazing is more likely to dominate in areas with lower nutrient availability. This effect needs to be factored into the explanation of why the impacts under RCP8.5 are less pronounced.

Many thanks for these points, which we fully agree with and have addressed as follows.

In section 2.4 temperature dependence, we added:

“Photosynthesis is light limited, which results in a sub-exponential growth rate, while competing effects of nutrient demand and zooplankton predation increase exponentially and together progressively limit net productivity as temperatures increase. We note that temperature dependence may be complicated by co-varying factors such as nutrient availability, leading to disproportionate effects depending on location. To explore these dependencies, chlorophyll and nutrient density are plotted against SST in appendices A1 and A2 respectively, with data separated into binned subsets with different nutrient density. When nutrient density is low ( $< 0.017$  mmol/m<sup>3</sup>), 30% of the variance in chlorophyll is explained by temperature, with a negligible contribution of co-varying nutrient (only 7% of nutrient variance can be explained by SST in this bin). In contrast, under high nutrient concentrations ( $>0.1$  mmol/m<sup>3</sup>), while 51% of the variance in chlorophyll can be explained by temperature, as much as 41% of this could be explained by co-variance of nutrients with temperature. In summary chlorophyll is limited by increasing temperature both through increased nutrient demand and zooplankton grazing, and through reduced nutrient availability, likely, at least in part, driven by the increasing nutrient demand.”

In 4.1 General discussion

“However, under the RCP8.5 scenario, the effect of phytoplankton light absorption on the climate system is reduced. This is likely due to decreasing ecosystem productivity as temperature increases (Appendix A1 and A2), caused by exponentially increasing nutrient demand and zooplankton predation, combined with sub-exponential (light limited) increases in photosynthesis.”

Line 169: the six oceanic layers should appear in the ecosystem section as this is a departure from Ward et al., (2018)

We added this information in the “Ecosystem community component” section. See comment line 132-133.

Lines 190 – 191 / 349 – 350: I think the authors are correct in their assertion that the ecosystem will spin up rapidly with the initial biogeochemical state. However, the ecosystem will have an impact on the biogeochemistry via a different uptake of nutrients and carbon and because this impact is broadcast to the deep ocean via sinking particulates it's likely there is a much longer drift in the biogeochemistry. It would help to have an additional experiment to quantify this drift and its impact on the simulations. The alternative approach is to perform a second coupled biogeochemistry-ecosystem spin-up to allow the biogeochemistry to adjust.

We agree that switching on ECOGEM will have an impact on the biogeochemistry. However, our results are focused upon the impact of light absorption relative to simulations without light absorption, so the drift is explicitly accounted for - it is common to the experiments with and without the effect. We have clarified this with the text:

“Switching on ECOGEM has an impact on the biogeochemistry via a different uptake of nutrients and carbon. However, we are interested in the effect of light absorption by phytoplankton relative to simulations without light absorption and our experimental results are differences between two otherwise identical simulations; the altered atmospheric CO<sub>2</sub> and subsequent long-term drift in the carbon cycle induced by ECOGEM are common to both experiments.”

Section 4.1.1:

- The variation in  $b$  values of around 0.01 reported in Table 1 is incredibly small given the observed spatial variability in the ocean (0.4 to 1.4: Henson et al., 2012; Marsay et al., 2015) and projected future values with temperature dependent remineralisation (~0.25; Laufkotter et al., 2017). The percentage of POC sinking beyond 1000m, an indication of carbon sequestration, calculated from a Martin Curve with the min/max values in Table 2 ranges from 20.8% to 21.4%. Overall, this suggests a very minimal change in the Biological Carbon Pump in response to the light absorption.

To compare the strength of the biological carbon pump, we changed our approach. In our model setup, the POC exponential is fixed and spatially invariant so it wasn't surprising the  $b$  values were roughly constant when we fit to the data. In the revised manuscript we compare the global POC flux between simulations, which defined the amount of POC transported to the deep ocean. In section 3.1.1 we modified Table 2 and add the text:

“To compare the strength of the biological carbon pump between our simulations, we consider vertical fluxes of POC in the water column. In our study, these fluxes are described by an exponential decay, which is fixed and spatially invariant. Under RCP2.6, RCP4.5 and RCP6.0 scenarios, the POC flux decreases by 4-5% when phytoplankton light absorption is simulated (Table 2). For the RCP8.5 scenario, the

effect is smaller, with a POC flux reduced by 1% due to phytoplankton light absorption. In our simulations, independently of the RCP scenario, phytoplankton light absorption decreases the POC flux (Table 2), indicating that less organic matter is transported towards the bottom of the ocean. This reduced export efficiency is due to an enhanced remineralization at the ocean surface, which is driven by a higher amount of organic matter in the ocean surface. Indeed, the surface net primary production increases with phytoplankton light absorption (Table 2), leading to an enhanced remineralization at the ocean surface. These results indicate that biological pump is weaker with phytoplankton light absorption meaning that more inorganic matter, such as nutrients, is located in the surface of the ocean (Table E1).”

- “...we compute [vertical POC fluxes] via a Martin curve...” - I’m totally sure what this means, did you fit a power-law curve to the vertical profile of POC fluxes predicted by the model? If so, what did you use as the normalisation depth and does this include POC generated in the upper 6 depth levels? Generally, this is not as straight forward as suggested because an exponential curve has linear attenuation whilst a power-law has non-linear attenuation (Lauderdale & Cael 2021).

We modified our approach and we use the POC flux as a proxy to study the strength of the biological carbon pump (see above). We do not fit our data to a Martin curve anymore.

- is the exponential decay function normalised to the bottom depth of the euphotic zone of the model (assuming this is the bottom of the sixth depth level where light penetrates)?

The exponential decay function is normalized to the third oceanic layer (78 m), where the POC flux is maximum.

- The authors seem to suggest the change in remineralisation is occurring in the surface, where I assume the adjusting ecosystem is driving that change, rather than changing the attenuation of POC fluxes across the water column. It would help to see a vertical profile of POC fluxes to confirm this. If this is true and the changes in  $b$  reflect this, then this is slightly conflating concepts of POC attenuation, as measured by  $b$ , and changing export efficiency (the ratio of export at some reference depth to production:  $f$ -ratio, see Henson et al., 2011).

We thank the reviewer for this point. Indeed, the adjusting ecosystem drives change in remineralization and changes in attenuation of POC fluxes. To prove the latter, we computed the  $f$ -ratio and  $Th_{Ei}$ -ratio (see table below). These two parameters define the fraction of organic matter exported in the deep ocean (Henson et al., 2011). A decrease in these two parameters indicates a reduced export efficiency of organic matter. Here, these two parameters are computed via the global SST of each simulation, as defined in Henson et al. (2011). Independently of the RCP scenario considered, phytoplankton light absorption decreases the  $f$ -ration and  $Th_{Ei}$ -ration,

indicating that this biogeophysical mechanism reduced the export efficiency of organic matter and thus weakens the biological pump. In the revised manuscript, we changed our approach and rephrased the whole section (see above).

| Simulation | f-ratio | ThEi-ratio |
|------------|---------|------------|
| RCP2.6     | 0.3010  | 0.0642     |
| RCP2.6LA   | 0.2892  | 0.0612     |
| RCP4.5     | 0.2584  | 0.0541     |
| RCP4.5LA   | 0.2464  | 0.0516     |
| RCP6.0     | 0.2364  | 0.0496     |
| RCP6.0LA   | 0.2250  | 0.0474     |
| RCP8.5     | 0.1558  | 0.0359     |
| RCP8.5LA   | 0.1512  | 0.0353     |

Line 229: “more labile” – this infers POC has different reactivity in the model, is this true?

We apologize for the confusion here. By “labile organic matter” we meant dissolved organic matter. We rephrased by:

“This increase is due to the increased global phosphate concentrations (Appendix D1) which are driven by a reduced export efficiency of organic matter and enhanced remineralization at the ocean surface (Table 2)”

Figure 4: It might help to have some indication of how big these changes are relatively, i.e., compared to the overall final-preindustrial change, though I appreciate the comparisons are focused on the final state with and without the light absorption.

As stated by the reviewer, the scope of this study is to compare the state of the climate system with and without phytoplankton light absorption (PLA). As an indication, we computed the changes in chlorophyll compared to the pre-industrial era but we do not report these values in the revised manuscript. The second column of the table below represents the changes between the simulations with minus without phytoplankton light absorption (values on Fig. 4). The third column represents the difference in chlorophyll between our simulations with phytoplankton light absorption minus the pre-industrial state. Our results indicate that, following future climate scenarios, chlorophyll decreases.

| Scenario | PLA – NoPLA | PLA – PreInd |
|----------|-------------|--------------|
| RCP2.6   | +13%        | -4%          |
| RCP4.5   | +12%        | -5%          |
| RCP6.0   | +15%        | -3%          |
| RCP8.5   | +8%         | -7%          |

Figure 6 and Section 4.1.3: The spatial patterns in SST differences for RCP8.5 look to be different to the other scenarios. There is greater warming at the poles compared

to smaller warming in the other scenarios which is an interesting feature that doesn't seem to be discussed in the text.

Thank you for this point, we added the explanation:

"In contrast, under RCP8.5, the maximum SST increase of 0.51°C occurs in the Southern Ocean. This is due to the greatly reduced annually averaged sea ice under RCP8.5, meaning that the latent heat buffering effect of melting/growing sea-ice is weaker, allowing heating of the ocean surface. The annual ice cover in the simulation RCP8.5-LA is only  $5.1 \times 10^6$  km<sup>2</sup> of the global ocean surface at 2500, which compares to  $25.8 \times 10^6$  km<sup>2</sup> for RCP2.6-LA."

Lines 286 – 289: It's not clear here whether the quoted changes in the carbon pumps is from the previous paper or this study.

These results are actually from this study. We rephrased by:

"Our results indicate that the reduced solubility pump..."

Lines 375 – 378:

- It would help to give a sense of this change relative to the overall change in the carbon cycle to support your suggestion that phytoplankton light absorption leads to major carbon cycle uncertainties.

Implementing phytoplankton light absorption increases the atmospheric carbon content by ~23% and ~8% under RCP2.6 and RCP8.5 scenario, respectively. We rephrased by:

"For instance, with our model setup, implementing phytoplankton light absorption increases the atmospheric carbon content by 79 GtC (23%) under RCP2.6 and by 258 GtC (8%) under RCP8.5, compared to the simulations without this biogeophysical mechanism."

- "This study highlights a highly uncertain feedback on the carbon cycle that is missing from 50% of the CMIP6 models" – this is a crucial point for justifying this study which is left to the very end of the manuscript! This would be really beneficial to mention in the introduction.

At the end of the second paragraph of the introduction we added the sentence:

"All these previous studies have demonstrated that phytoplankton light absorption affects the future climate projections but, to this day, this biogeophysical mechanism is missing from 50% of the CMIP6 models (Pellerin et al., 2020)."

## References

Cael, B.B., Bisson, K., Boss, E. et al. (2023) Global climate-change trends detected in indicators of ocean ecology. *Nature* 619, 551–554. <https://doi.org/10.1038/s41586-023-06321-z>

Henson et al., (2011) A reduced estimate of the strength of the ocean's biological carbon pump. *Geophysical Research Letters*. 38, L04606. doi:10.1029/2011GL046735



Lauderdale, J. M., & Cael, B. B. (2021). Impact of remineralization profile shape on the air-sea carbon balance. *Geophysical Research Letters*, 48, e2020GL091746. <https://doi.org/10.1029/2020GL091746>

Laufkötter, C., J. G. John, C. A. Stock, and J. P. Dunne (2017), Temperature and oxygen dependence of the remineralization of organic matter, *Global Biogeochemical Cycles*, 31, 1038–1050, doi:10.1002/2017GB005643.

Ward et al., (2018), EcoGENIE 1.0: plankton ecology in the cGENIE Earth system model, *Geoscientific Model Development*. 11, 4241–4267, <https://doi.org/10.5194/gmd-114241-2018>

Asselot, R., et al. (2021) "The relative importance of phytoplankton light absorption and ecosystem complexity in an Earth system model". *Journal of Advances in Modeling Earth Systems* 13.5: e2020MS002110.

Asselot, R., et al. (2022) "Climate pathways behind phytoplankton-induced atmospheric warming." *Biogeosciences* 19.1: 223–239.

Pellerin, F. (2020) "ESD Reviews: Evidence of multiple inconsistencies between representations of terrestrial and marine ecosystems in Earth System Models." *Earth System Dynamics Discussions*: 1–26.

Ward, B., et al. (2018), EcoGENIE 1.0: plankton ecology in the cGENIE Earth system model, *Geoscientific Model Development*. 11, 4241–4267, <https://doi.org/10.5194/gmd-114241-2018>
